# Supplementary material for: Interfacial microenvironment modulation enhancing catalytic kinetics of CoNiP@NiFe LDH heterostructures for highly efficient oxygen evolution reaction
Source: Royal Society of Chemistry journal article supplement (doi:10.1039/d3ra05717h), 2023-01-01
Supplement: d3ra05717h1.pdf [file d3ra05717h1.pdf]

## Supporting Materials

### **Interfacial Microenvironment Modulation Enhancing Catalytic Kinetics of CoNiP@NiFe LDH Heterostructures for Highly Efficient Oxygen Evolution Reaction**

Jie Zhang,<sup>a</sup> Donggang Guo,<sup>b, c \*</sup>

---

<sup>a</sup> College of Life Science, Shanxi University, Taiyuan 30006, China.

<sup>b</sup> College of Environment and Resource, Shanxi University, Taiyuan 30006, China

<sup>c</sup> Shanxi Laboratory for Yellow River, Taiyuan 30006, China

---

E-mail address: gdghjkx@126.com (Donggang Guo)

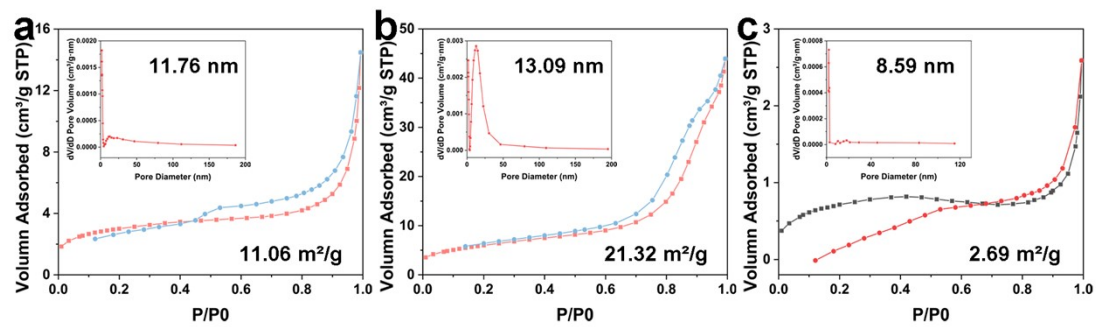

**Fig. S1.** The N<sub>2</sub> adsorption/desorption isotherm of (a) CoNi-pristine/NF, (b) CoNiP/NF, (c) CoNiP@NiFe-LDH/NF (insets are corresponding pore diameter distribution curves).

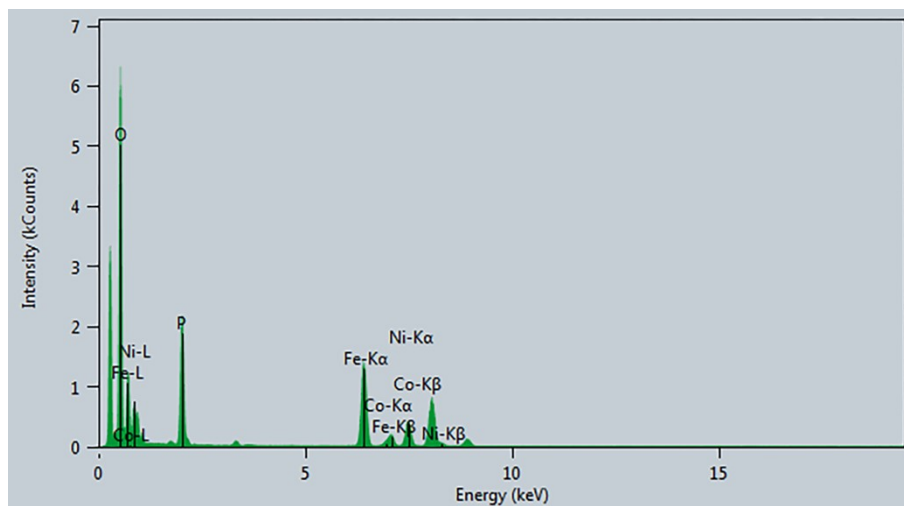

**Fig. S2.** The corresponding energy dispersive X-ray (EDX) spectra of CoNiP@NiFe-LDH/NF.

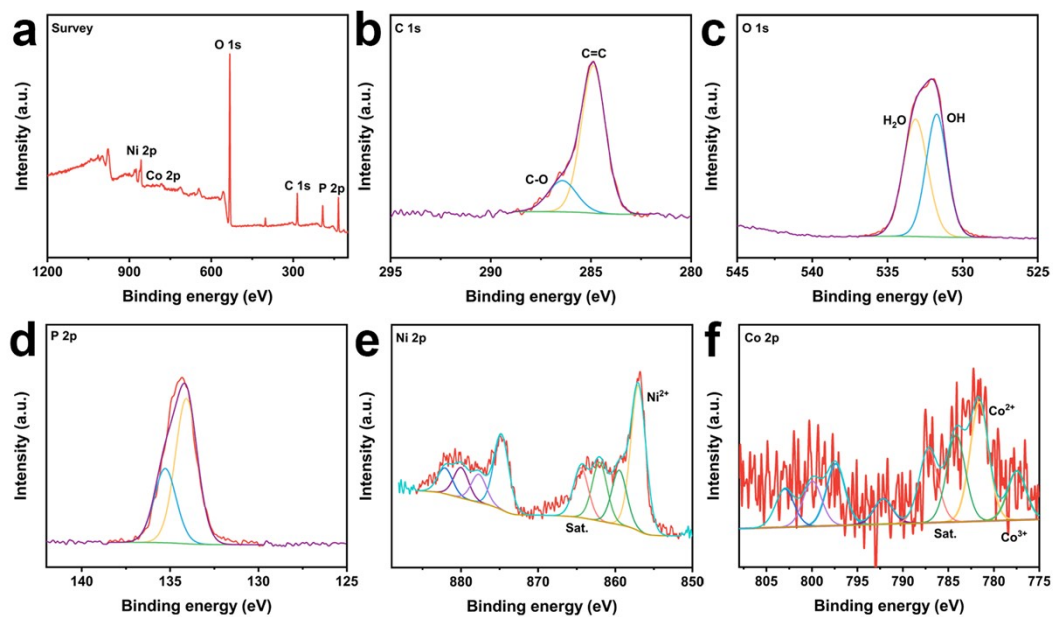

**Fig. S3.** The survey spectra (a), high-resolution X-ray photoelectron spectra of (b) C 1s, (c) O 1s, (d) P 2p, (e) Ni 2p, and (f) Co 2p of CoNiP/NF.

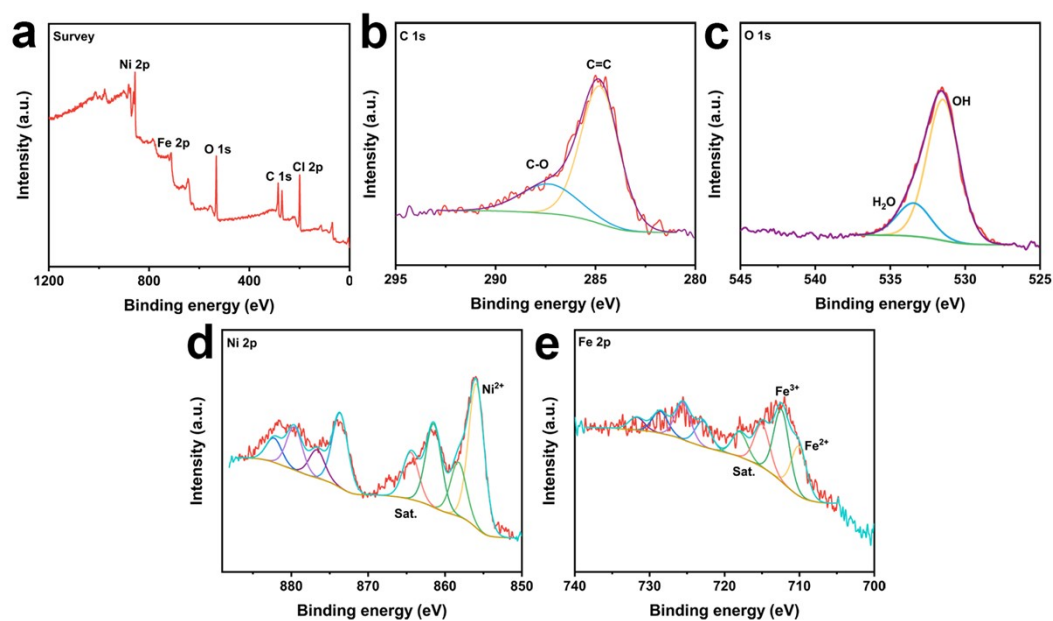

**Fig. S4.** The survey spectra (a), high-resolution X-ray photoelectron spectra of (b) C 1s, (c) O 1s, (d) Ni 2p, and (e) Fe 2p of NiFe-LDH/NF.

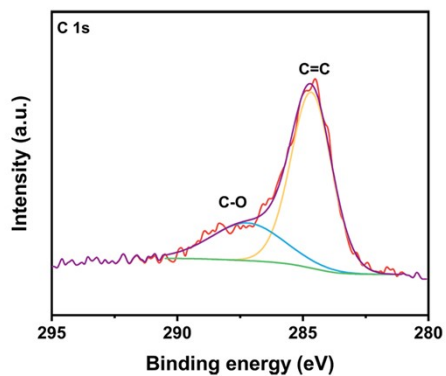

**Fig. S5.** The high-resolution X-ray photoelectron spectra of C 1s of CoNiP@NiFe-LDH/NF.

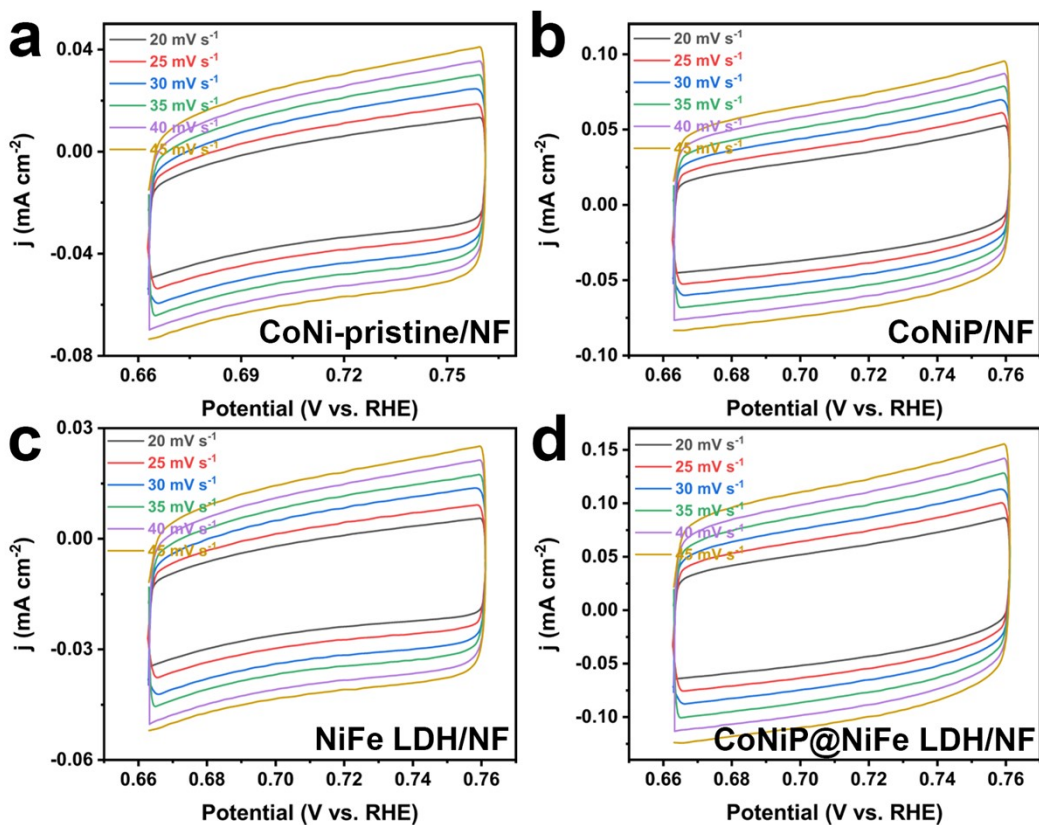

**Fig. S6.** CVs of (a) CoNi-pristine/NF, (b) CoNiP/NF, (c) NiFe LDH/NF, and (d) CoNiP@NiFe LDH.

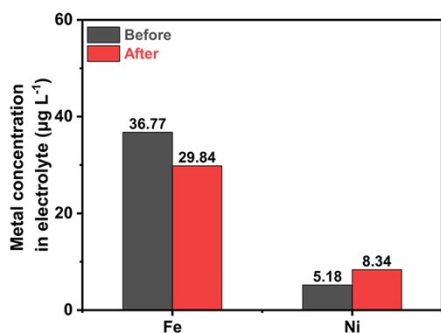

**Fig. S7.** The concentration of metal in the electrolyte before and after the reaction.

**Table S1.** N<sub>2</sub> adsorption-desorption data of catalysts.

| Catalysts         | BET Surface Area (m <sup>2</sup> /g) | Pore Size (nm) | Pore Volume (cm <sup>3</sup> /g) |
|-------------------|--------------------------------------|----------------|----------------------------------|
| CoNi-pristine/NF  | 11.06                                | 11.76          | 0.022394                         |
| CoNiP/NF          | 21.32                                | 13.09          | 0.067907                         |
| CoNiP@NiFe-LDH/NF | 2.69                                 | 8.59           | 0.003794                         |

**Table S2.** Summary of OER performances in 1.0 M KOH in this work.

| Sample               | Overpotential (mV) at 10 mA cm <sup>-2</sup> | Tafel slope (mV dec <sup>-1</sup> ) | R <sub>ct</sub> (Ω) | R <sub>s</sub> (Ω) | C <sub>dl</sub> (mF cm <sup>-2</sup> ) | ECSA (cm <sup>2</sup> ) |
|----------------------|----------------------------------------------|-------------------------------------|---------------------|--------------------|----------------------------------------|-------------------------|
| RuO <sub>2</sub> /NF | 265                                          | 52.2                                | 1.127               | 0.91989            | -                                      | -                       |
| CoNi-pristine/NF     | 249                                          | 54.5                                | 0.47209             | 0.78752            | 0.95                                   | 23.75                   |
| CoNiP/NF             | 217                                          | 43.5                                | 0.77708             | 0.86399            | 1.49                                   | 37.25                   |
| NiFe LDH/NF          | 297                                          | 47.8                                | 0.41668             | 0.85138            | 0.69                                   | 17.25                   |
| CoNiP@NiFe LDH/NF    | 207                                          | 36.5                                | 0.35476             | 0.80399            | 2.33                                   | 58.25                   |
| NF                   | 279                                          |                                     | 1.06764             | 1.00048            |                                        |                         |

**Table S3.** Summary of OER performances in 1.0 M KOH.

| Sample                                  | Overpotential (mV) at 100 mA cm <sup>-2</sup> | Tafel slope (mV dec <sup>-1</sup> ) | Reference |
|-----------------------------------------|-----------------------------------------------|-------------------------------------|-----------|
| CoNiP@NiFe LDH/NF                       | 244                                           | 36.5                                | This work |
| CoMoO <sub>4</sub> -Ni(OH) <sub>2</sub> | 349                                           | 67.6                                | 1         |
| NiCoP@NiMn LDH/NF                       | 293                                           | 48.4                                | 2         |
| NG-NiFe@MoC <sub>2</sub>                | 400                                           | 31                                  | 3         |
| Cu@NiFe LDH/Cu Foam                     | 281                                           | 27.8                                | 4         |
| Ni <sub>3</sub> FeN/r-GO                | 320                                           | 54                                  | 5         |
| NiCo <sub>2</sub> S <sub>4</sub> /NF    | 370                                           | 40.1                                | 6         |

---

|                                           |     |      |    |
|-------------------------------------------|-----|------|----|
| CoFeV LDH/NF                              | 330 | 57   | 7  |
| Co <sub>0.8</sub> Fe <sub>0.2</sub> OOH@C | 292 | 33   | 8  |
| NiZnFeB-LDH                               | 280 | 48.4 | 9  |
| CuCo <sub>2</sub> S <sub>4</sub>          | 310 | 49   | 10 |

---

## References

1. Y. Xu, L. Xie, D. Li, R. Yang, D. Jiang and M. Chen, *ACS Sustainable Chem. Eng.*, 2018, **6**, 16086-16095.
2. P. Wang, J. Qi, X. Chen, C. Li, W. Li, T. Wang and C. Liang, *ACS Appl Mater Interfaces*, 2020, **12**, 4385-4395.
3. Q. Hu, X. Liu, B. Zhu, L. Fan, X. Chai, Q. Zhang, J. Liu, C. He and Z. Lin, *Nano Energy*, 2018, **50**, 212-219.
4. L. Yu, H. Zhou, J. Sun, F. Qin, F. Yu, J. Bao, Y. Yu, S. Chen and Z. Ren, *Energy Environ. Sci.*, 2017, **10**, 1820-1827.
5. Y. Gu, S. Chen, J. Ren, Y. A. Jia, C. Chen, S. Komarneni, D. Yang and X. Yao, *ACS Nano*, 2018, **12**, 245-253.
6. A. Sivanantham, P. Ganesan and S. Shanmugam, *Advanced Functional Materials*, 2016, **26**, 4661-4672.
7. Y. Hu, Z. Wang, W. Liu, L. Xu, M. Guan, Y. Huang, Y. Zhao, J. Bao and H.-m. Li, *ACS Sustainable Chem. Eng.*, 2019, **7**, 16828-16834.
8. X. Han, C. Yu, Y. Niu, Z. Wang, Y. Kang, Y. Ren, H. Wang, H. S. Park and J. Qiu, *Small Methods*, 2020, **4**, 2000546.
9. J. He, P. Xu and J. Sun, *ACS Sustainable Chem. Eng.*, 2020, **8**, 2931-2938.
10. S. Czioska, J. Wang, X. Teng and Z. Chen, *ACS Sustainable Chem. Eng.*, 2018, **6**, 11877-11883.
